# Supplementary material for: Evidence from field nitrogen balance and 15N natural abundance data for the contribution of biological N2 fixation to Brazilian sugarcane varieties
Source: Springer Nature journal article supplement (doi:10.1007/s11104-011-1016-3), 2011-10-21

0102  
4 12 2010

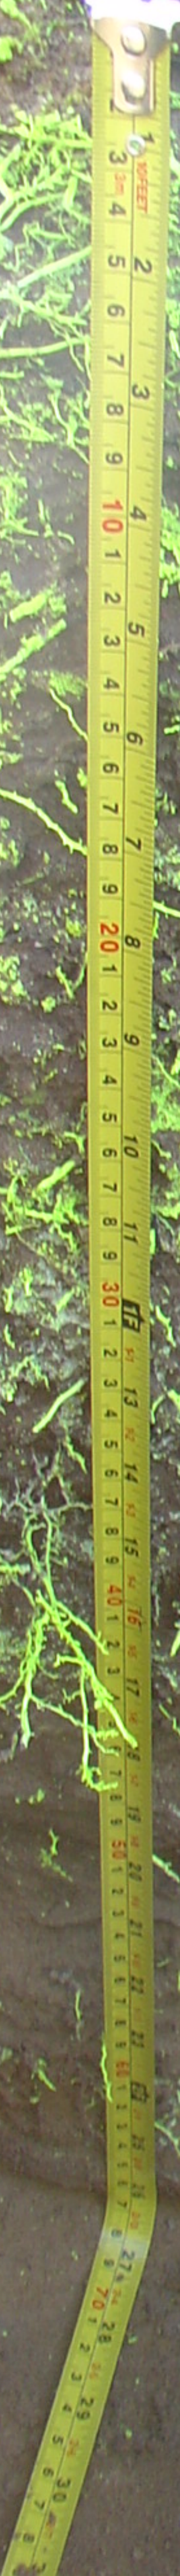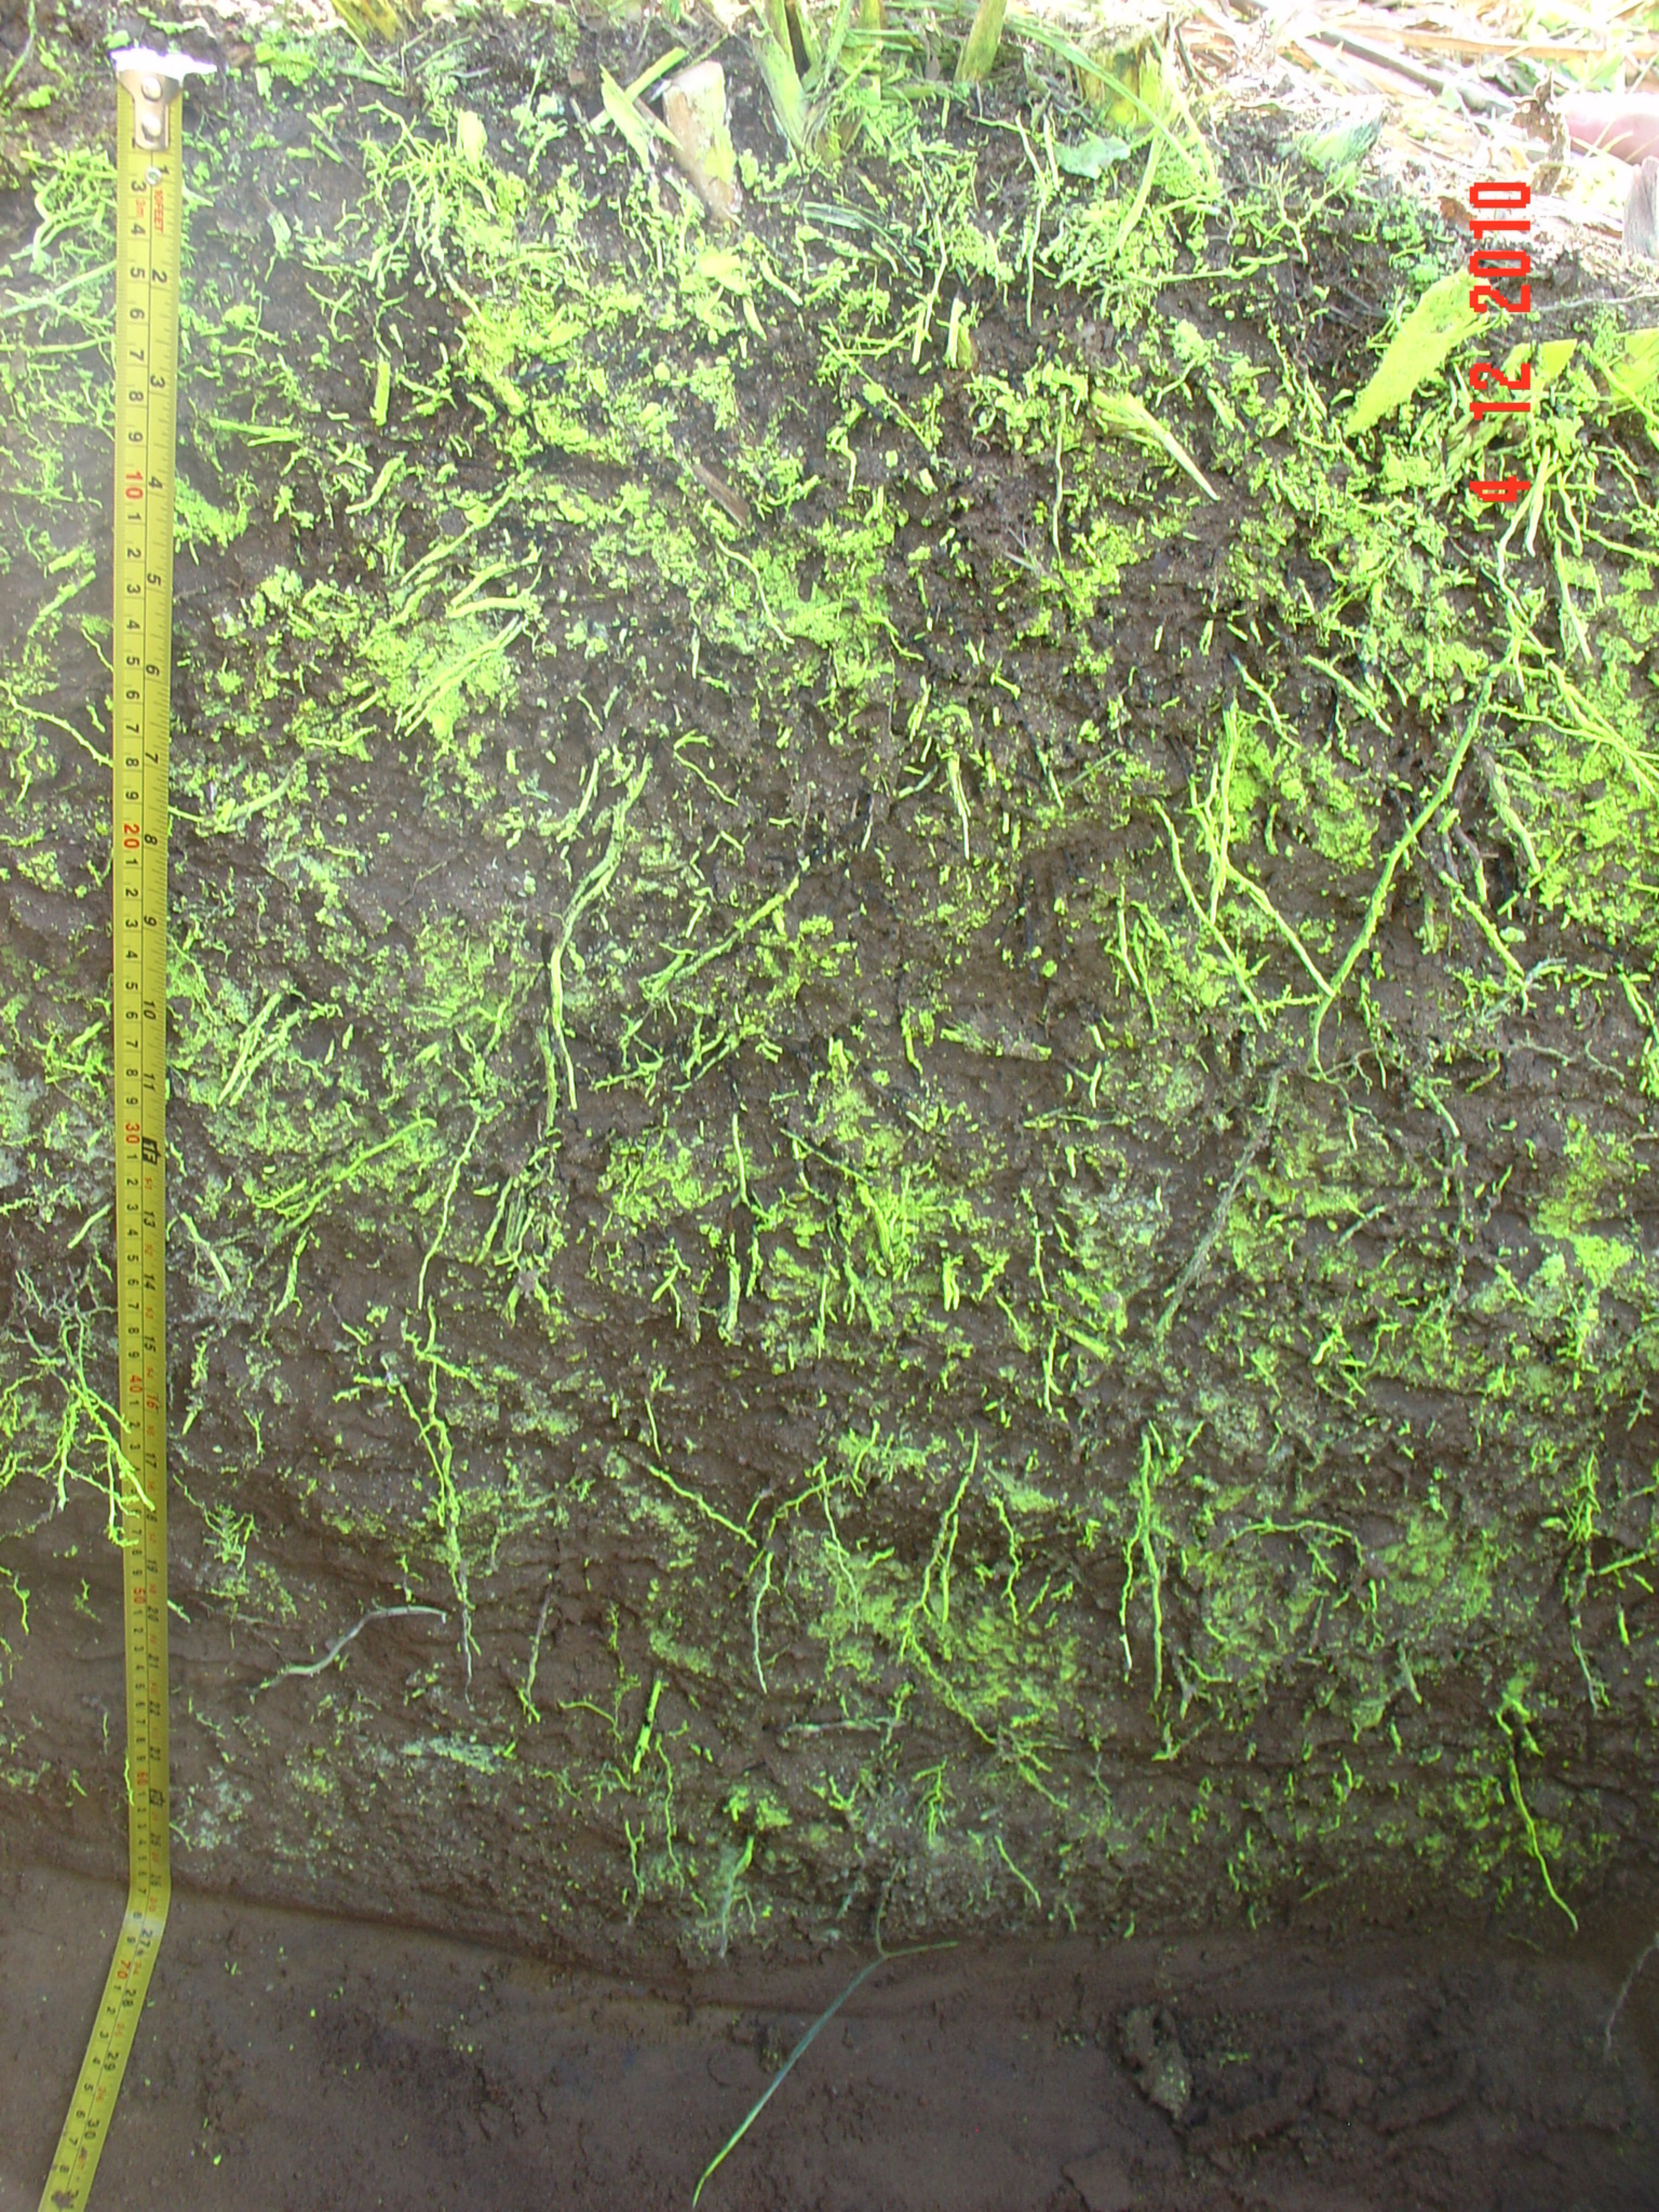



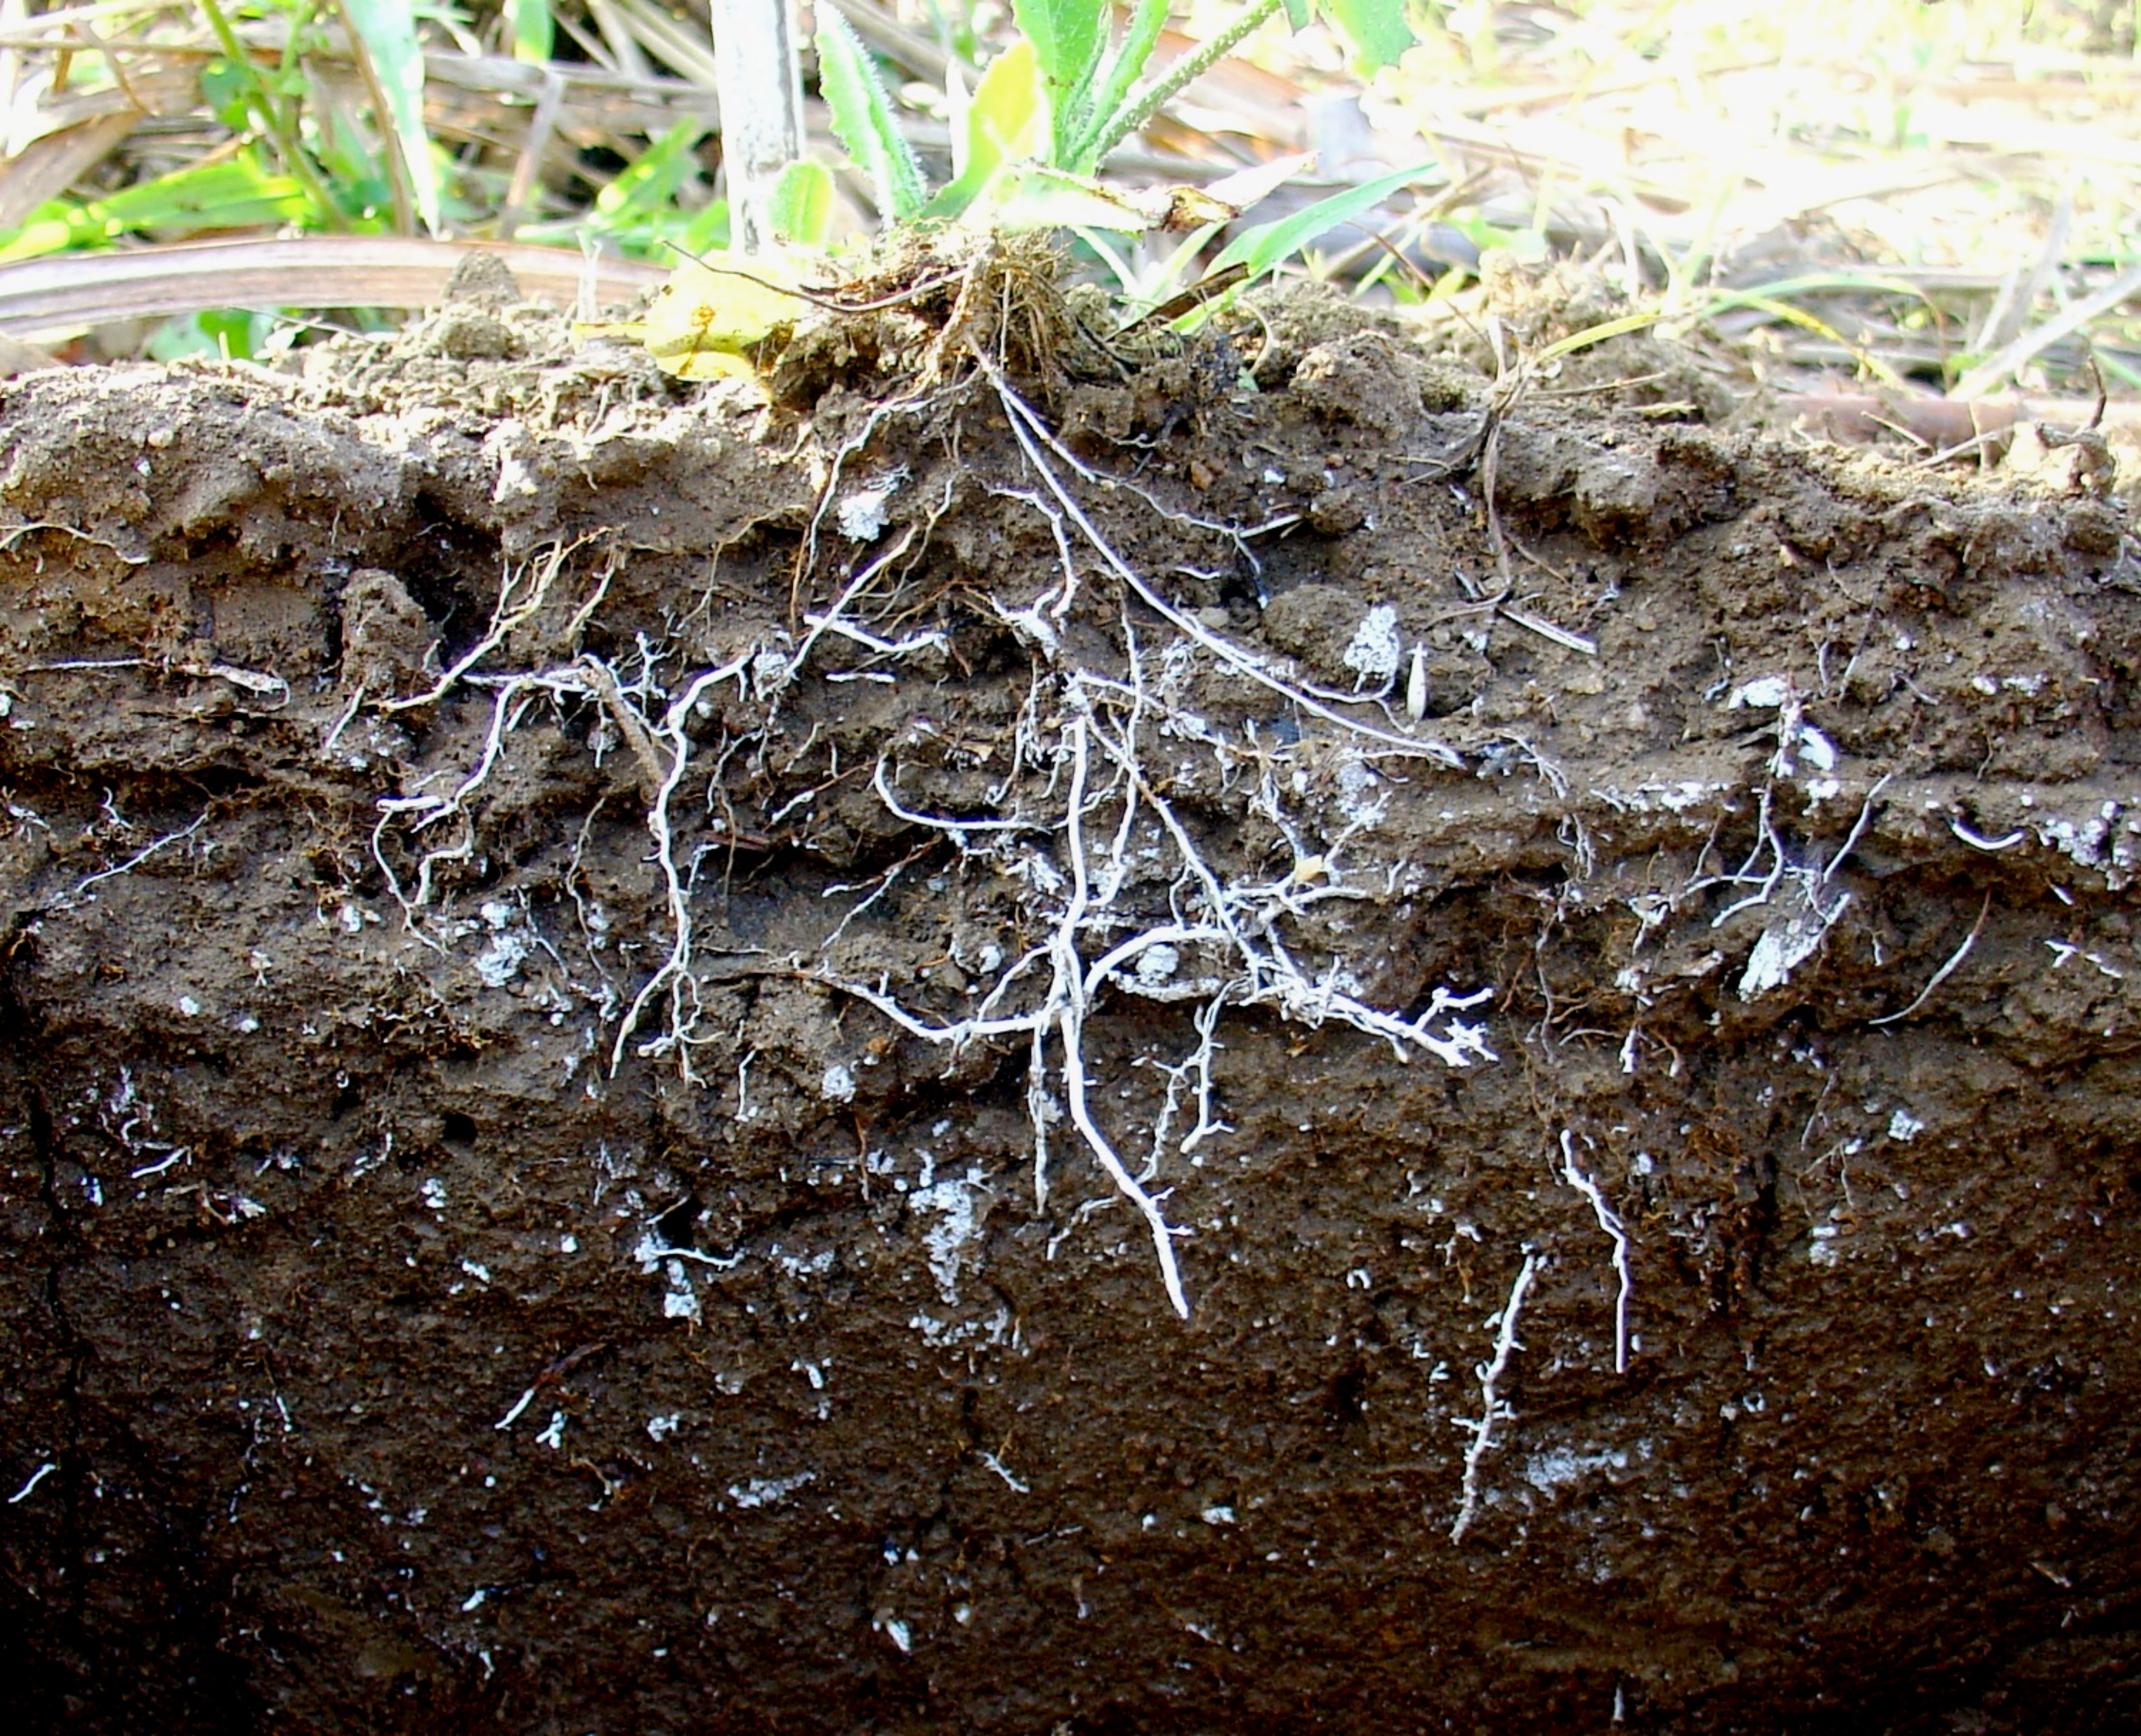



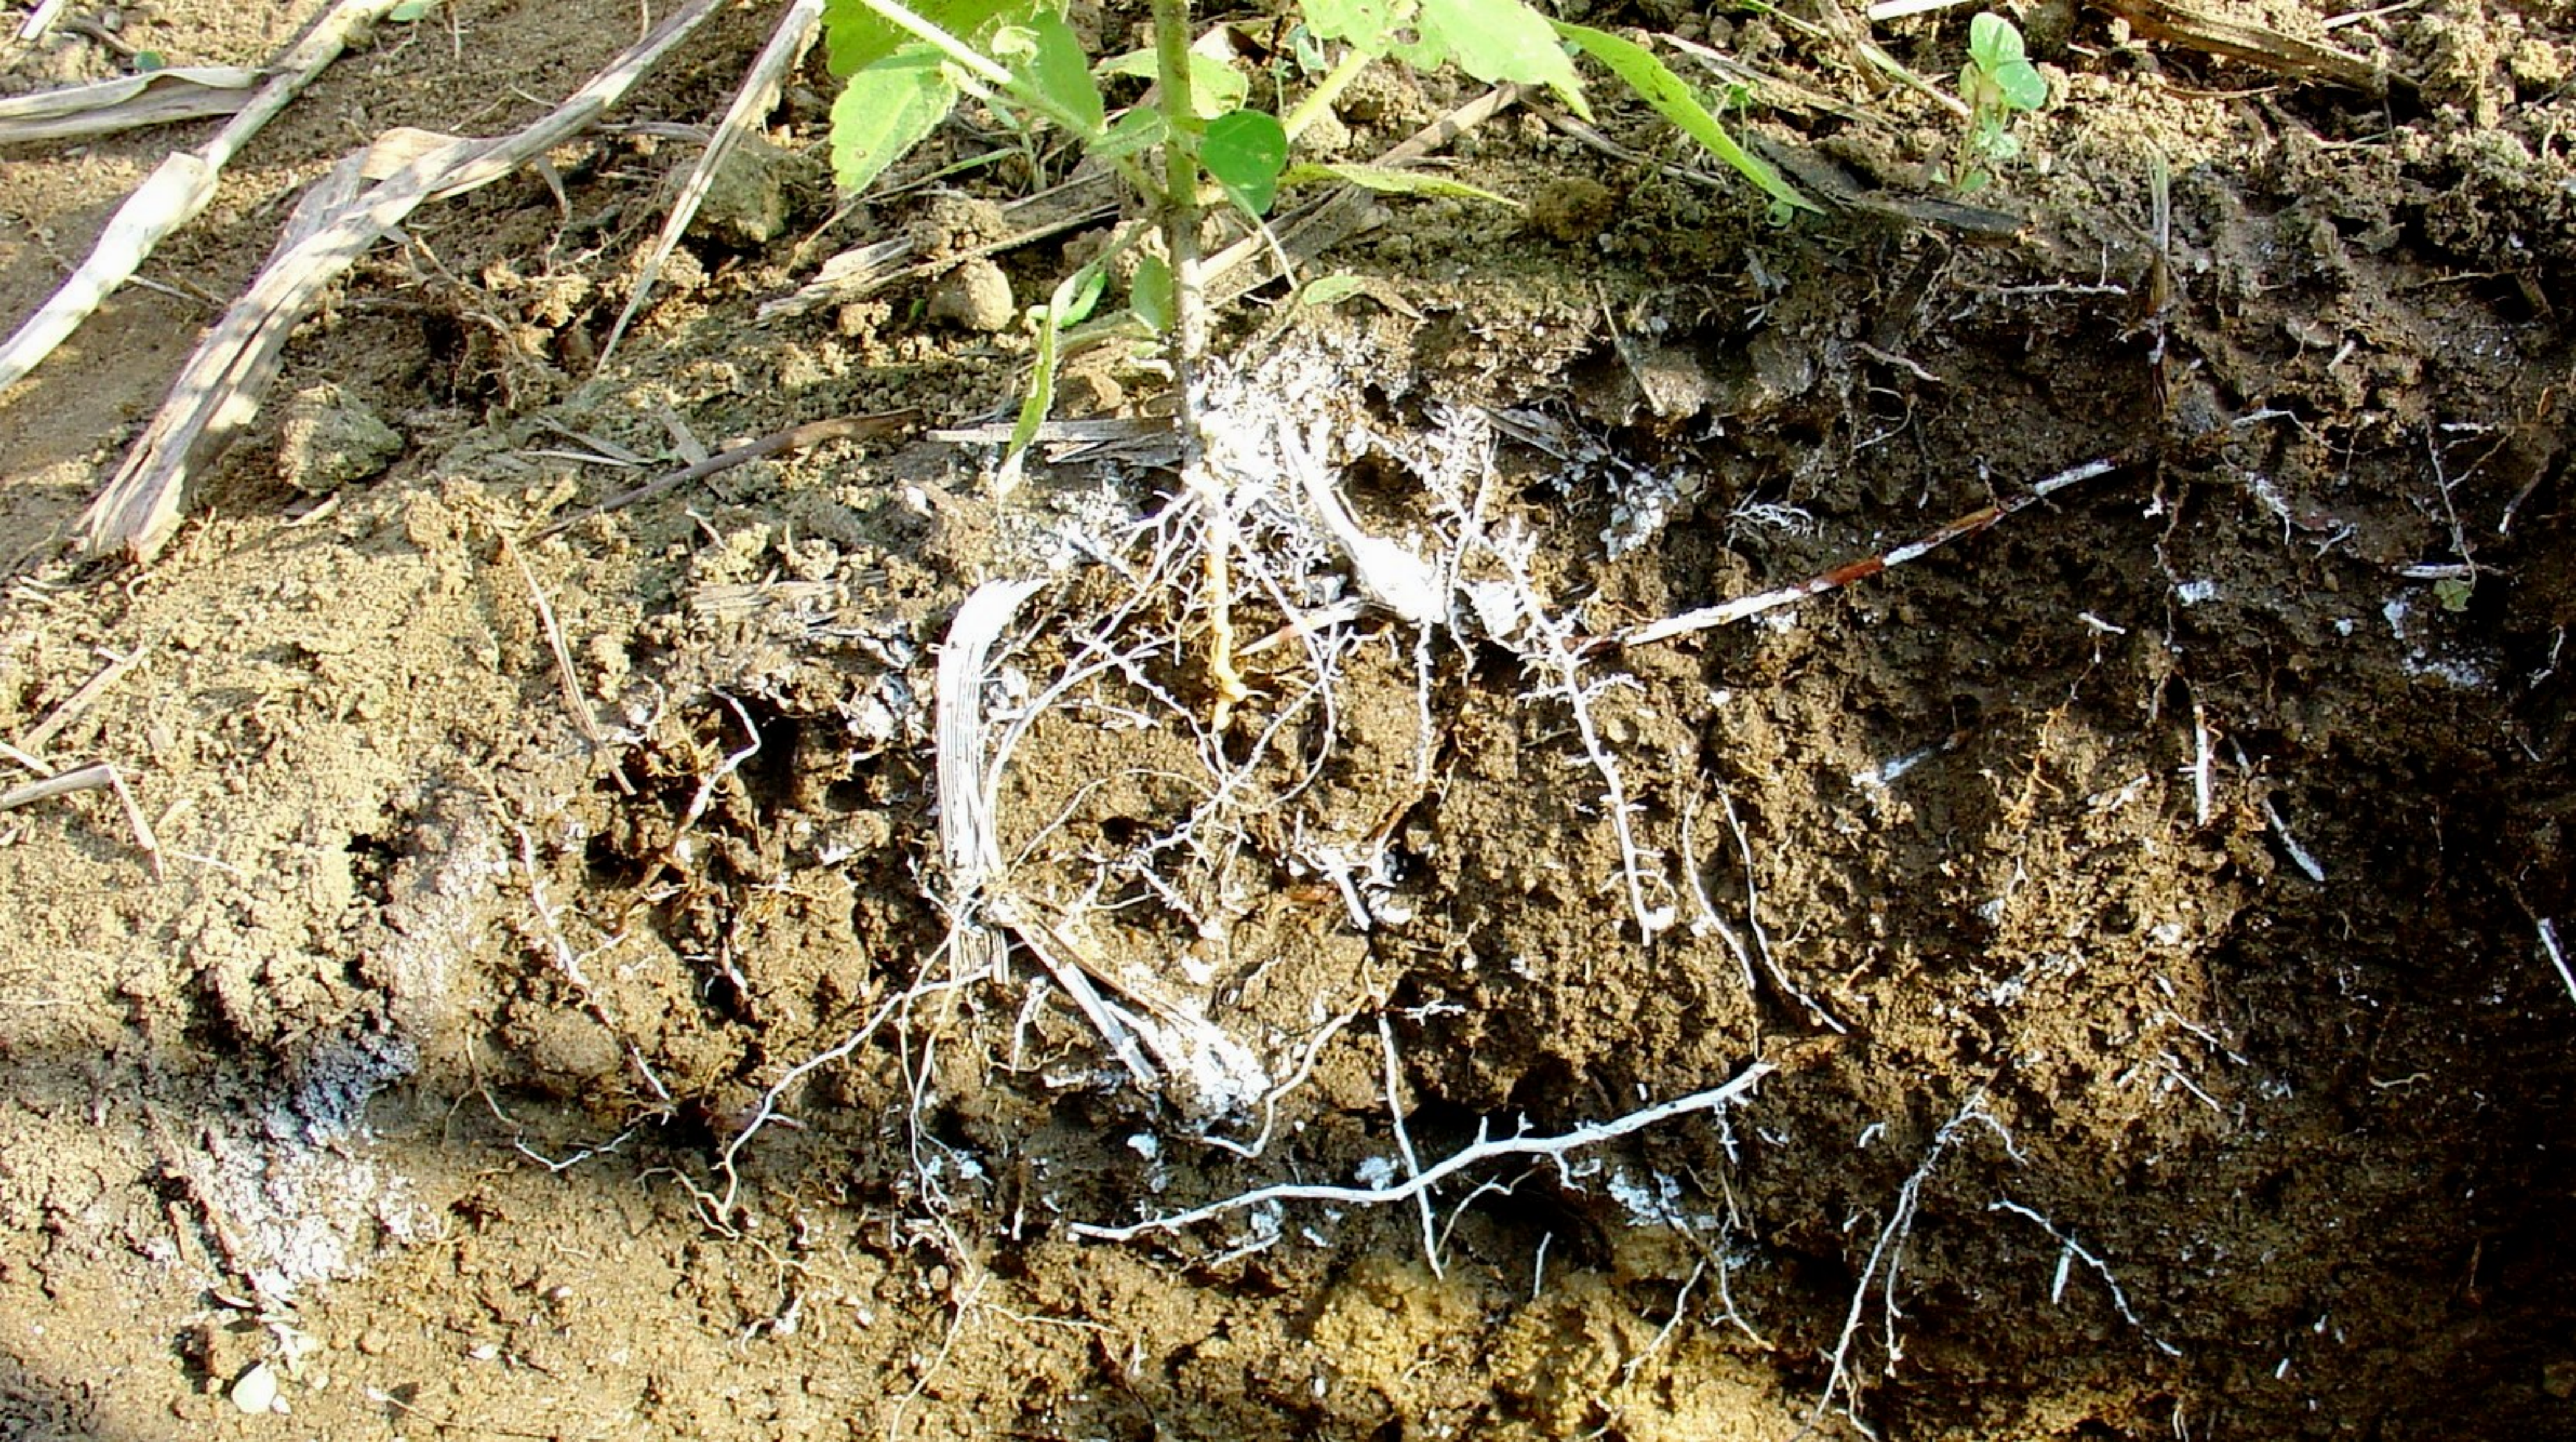

Supplement: 11104_2011_1016_MOESM1_ESM.pdf [file 11104_2011_1016_MOESM1_ESM.pdf]
